# Supplementary material
Source: PubMed Central journal article supplement (PMC7848545)
Supplement: pnas.2021943118.sapp.pdf [file pnas.2021943118.sapp.pdf]

# PNAS

www.pnas.org

Supplementary Information for

*“A Short ORF-encoded Transcriptional Regulator”*

Minseob Koh, Insha Ahmad, Yeonjin Ko, Yuxiang Zhang, Thomas F. Martinez, Jolene K. Diedrich, Qian Chu, James J. Moresco, Michael A. Erb, Alan Saghatelian, Peter G. Schultz, and Michael J. Bollong

Email: [mbollong@scripps.edu](mailto:mbollong@scripps.edu); [schultz@scripps.edu](mailto:schultz@scripps.edu)

**This PDF file includes:**

Figures S1 to S4

Supplementary Table S1 to S2

**Other supplementary materials for this manuscript include the following:**

Supplementary Data Set 1

Supplementary Data Set 2

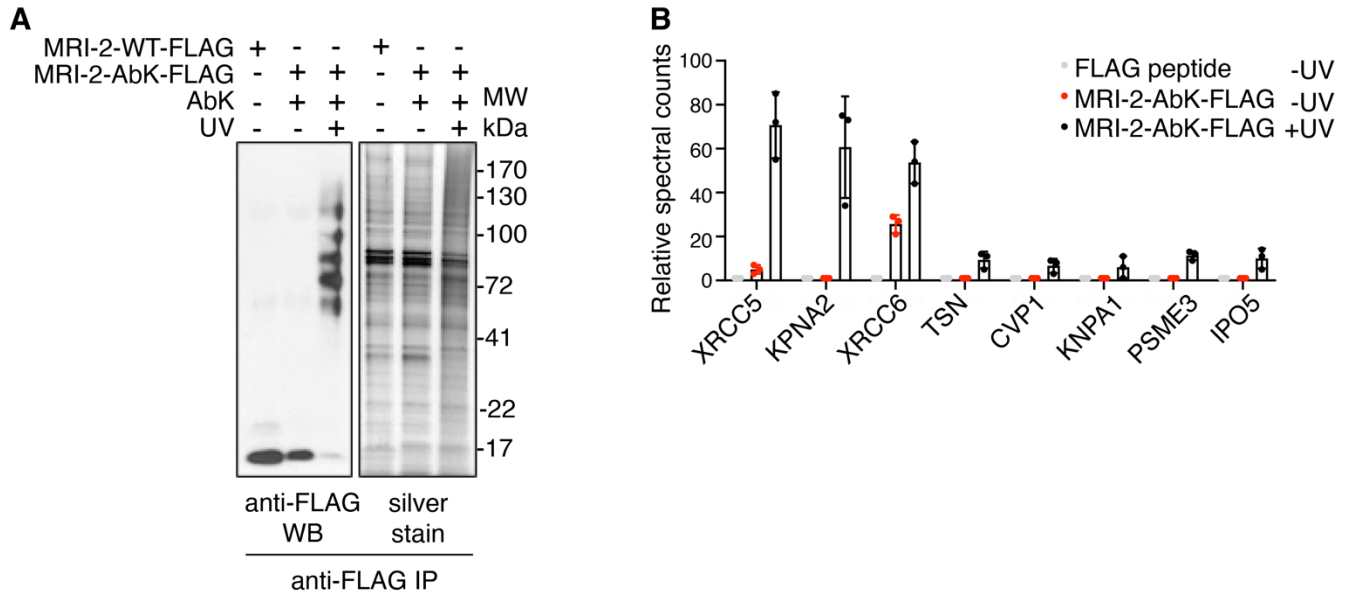

**Figure S1. AbK incorporation allows for the identification of reported and novel interactors of MRI-2.** A) Anti-FLAG Western blotting for anti-FLAG immunoprecipitated protein content from HEK293T cells after expression of the indicated MRI-2 transgenes in the presence or absence of UV. B) Relative spectral counts corresponding to the most enriched proteins identified by anti-FLAG immunoprecipitation after expression of MRI-2-AbK-FLAG in HEK293T cells for 48 hours with subsequent exposure to UV ( $n=3$ , mean and s.d.).

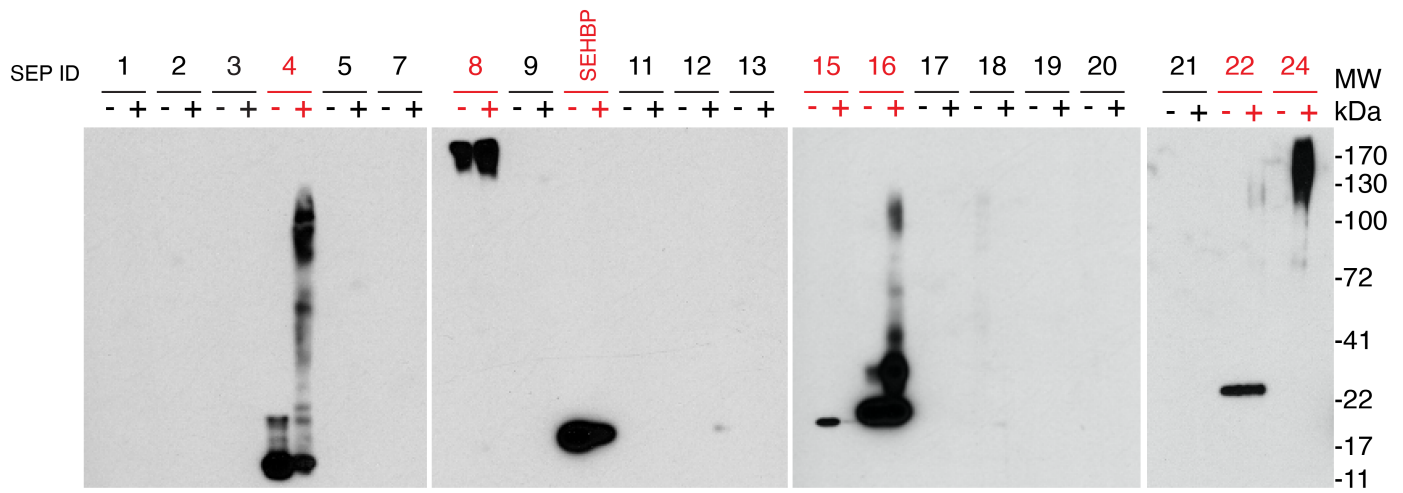

**Figure S2. A Western blotting-based screen identifies high-expressing SEPs with crosslinking potential.** Representative anti-FLAG Western blots from HEK293T cells expressing the indicated FLAG-tagged SEP transgenes in the presence or absence of UV. Identities of SEPs are listed in Table S1.

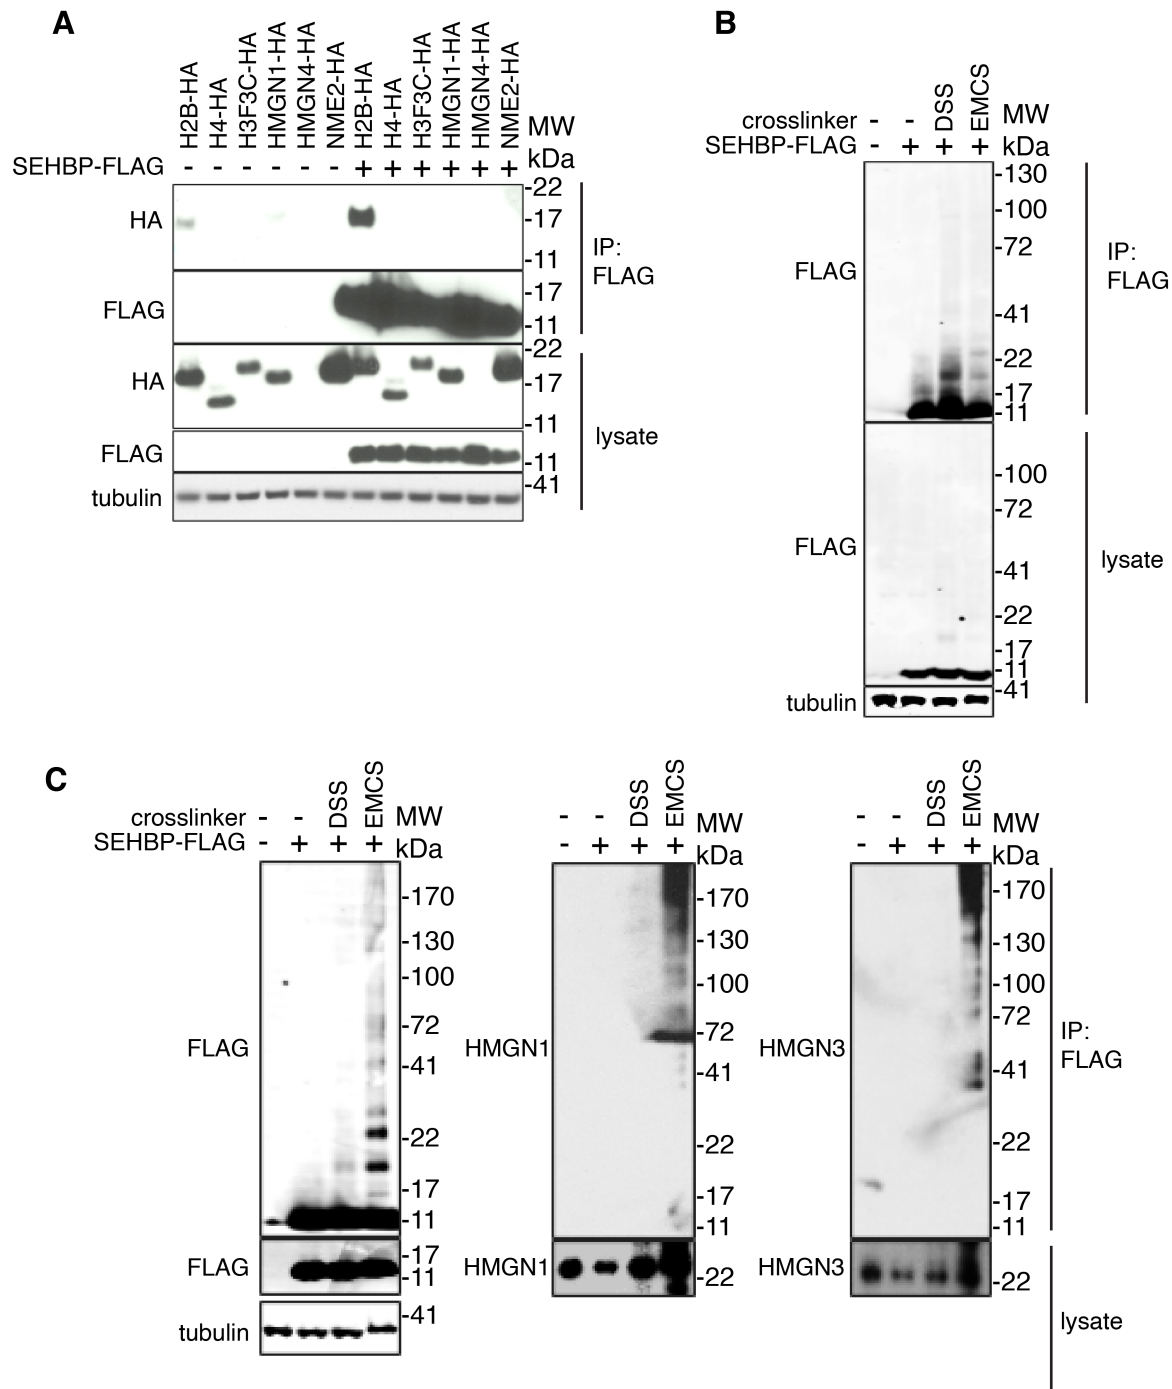

**Fig. S3. SEHBP interacts with Histone H2B and HMGN proteins.** A) Anti-HA Western blotting analysis after anti-FLAG immunoprecipitated protein content from HEK293T cells expressing SEHBP-FLAG and the indicated HA-tagged transgene preys. B) Anti-FLAG Western blotting analysis of anti-FLAG immunoprecipitated protein content after 48-hour exposure of SEHBP-FLAG and subsequent 1-hour treatment with the indicated chemical crosslinkers (1 mM). C) Western blotting analysis for endogenous HMGN1 and HMGN3 from HEK293T cells expressing SEHBP-FLAG for 48-hours and then exposed to the indicated chemical crosslinkers for 1 hour (1 mM).

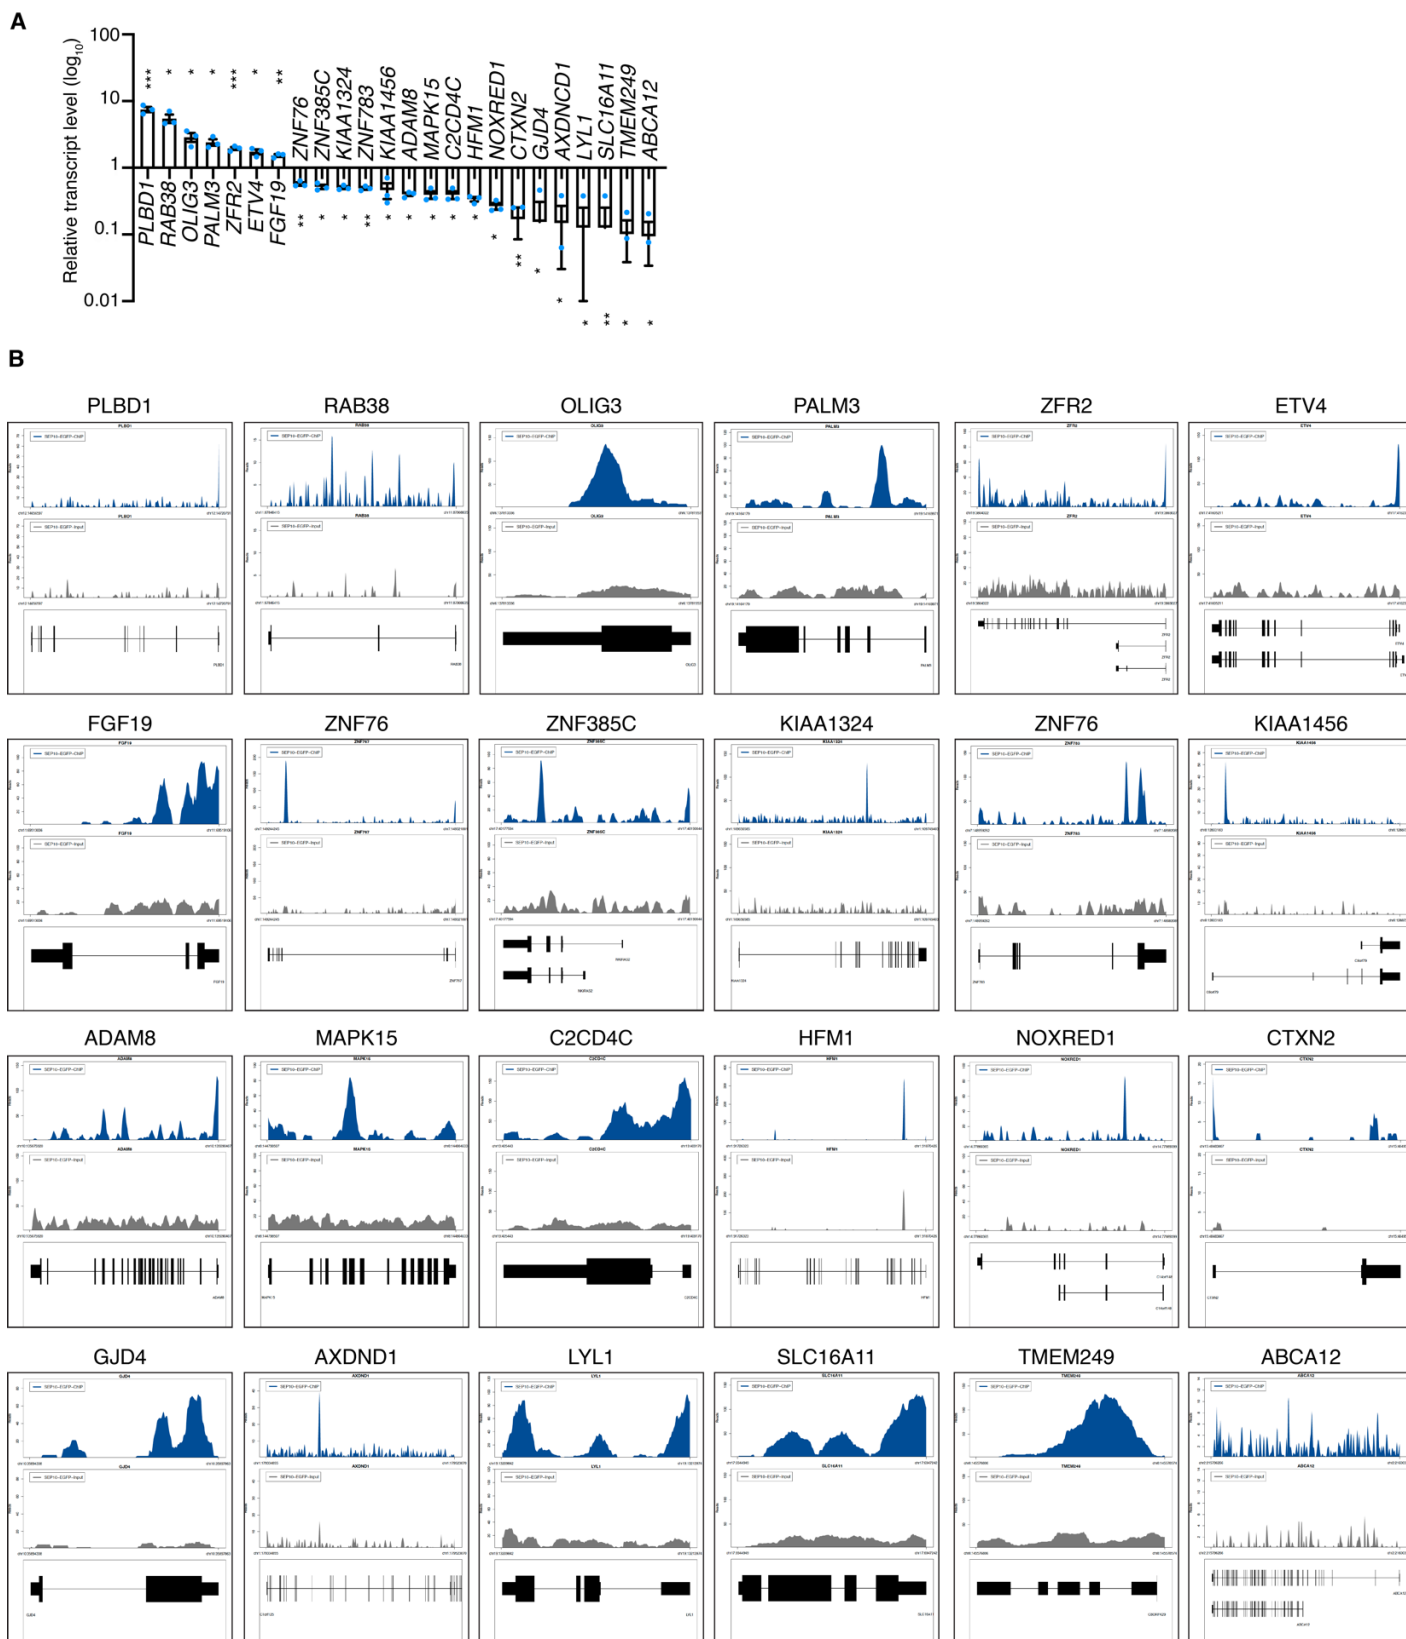

**Figure S4. SEHBP modulates transcription at associated genomic loci.** A) Relative abundance of the indicated transcripts derived from RNA-seq in response to SEHBP expression in HEK293T cells ( $n=3$ ; mean and s.d.;  $*P < 0.05$ ,  $**P < 0.005$ ,  $***P < 0.0005$ ,  $t$ -test). B) Plots depicting specific ChIP-seq-derived read abundance from SEHBP (blue) and background (grey) in relation to their genomic position with exons depicted as black boxes.

**Table S1- Nomenclature and sequences of the SEPs used in this work.** A lower case 'm' depicts an introduced ATG start site from a SEP using a noncanonical start codon.

| ID         | SEP amino acid sequence                                                | SEP length (aa) | Parent RNA      |
|------------|------------------------------------------------------------------------|-----------------|-----------------|
| 1          | mVRPDAISRSCAGPARLLVPGARVNRPRRSPD                                       | 34              | PMSD3           |
| 2          | mTVRTGRSRGSEAVSGLGKKCLLDLALGGTLATRVGVIG                                | 39              | KLF9            |
| 3          | MCLRRTTGYGHHDFRVPSFRSPAADPRRQTEALQ                                     | 34              | MEIS2           |
| 4          | MASEGKPRPGQAWRLPLEIGRAPFPAPRQQLCNSQPG                                  | 37              | HOXA3           |
| 5          | MTAPGLLKMSRICINIQQESIIVCPSSRAAKNGGIITSSKATL                            | 43              | FOXP4-AS1       |
| 6          | MVHCCHSPDCIFETQALSNLQRTKRQPPRYVCWEGVIVTAL                              | 41              | CLASP1          |
| 7          | MEDRWTAVWPVTSPLKPLESGPLSSAGHIIGILTHSLNSLFIKT                           | 44              | PIK3R1          |
| 8          | mLPERANKKKGAGVGSKINTSEFMMASTEALIGLKVSKQTITLWKKG                        | 46              | ZBTB37          |
| 9          | MIRPQSSMSKHIPQFCGVLGHTFMEFLKGS GDY CQA QH DLYADK                       | 44              | PTP4A1          |
| SEHBP (10) | MALRSIKSIAGSCLCSRQRRCGSSAAIFPEGIFRCLSPKFGQEFPE                         | 46              | ZNF689          |
| 11         | MLAFWAPNWHWEGVTESTRLIPGPTFKRSSTYNPSISLKTKTSLN                          | 45              | MBNL1           |
| 12         | MGACLIVNPSAWTPEPTQLSVCGRGPRVRGDAQAVAETTLEMLMKTG LSC                    | 49              | AHDC1           |
| 13         | MSPANGEQSRSRCLGSEG SCLRHRHGRWIQPPPAAPGAMRRGA AATATARL                  | 52              | GSK3B           |
| 14         | MASCPASVTSGSAFTKAFTRARGNLERRAPGTLVGAWGCEAAASPA GHYNYILRM               | 55              | LOC105374809    |
| 15         | MRQRLNSRRANQRHPESHVGLGAQRPSANPLKVSQRNLRDDLDP AERNCF                    | 50              | PCDHGC3         |
| 16         | MYRFRSQLFTGISAAATAHSYPRRFSTLLLAEDSPLSRPPHRRTSKK CSSIG                  | 52              | IFRD1           |
| 17         | mLWFGNVVDQLDMLAKCAPCNKMKRRDKMMSFSHIVKPKTNAFCE TKLTNL                   | 51              | FZD3            |
| 18         | MEGKWTICPGLQPDTIFQSQNLLHFLCKCQKNETPSLPSQRRGSNG SHVGTILSGS              | 56              | HOXB6           |
| 19         | mLSRCRRLPEERGGVPLALRPSRAESTRHSRTSEASRPRGTPPRR PPAGPRPLFPL              | 56              | antisense chr17 |
| 20         | MASDTQAVPDVSGRSRARRYAEWSSGLRRGAEP SGWAGLAGPAE GRRRLSGGEHALLHWRLS       | 63              | NDEL1           |
| 21         | mVQGSSGRHFRELVDVAVAGVDPELPKPPSCSPAWASLIPLFFLD SLG PSRPWNPIFGLGGSAAWA   | 65              | RBM39           |
| 22         | MRAGPRERQRRWRSGRRSPGREVWMRLTRGRAASPALVQRSPSA SDQSPVIMQDSGPISSASS       | 63              | DLX1            |
| 23         | MGDQPCASGRSTLPPGNAREAKPPKRCLLAPRDYPEGTPNGG STTLPSAPPPASAGLKSHPPPPEK    | 68              | LINC01420       |
| 24         | mLEELLPLPAPFLQKGGNIHLFMPVCCMQAFWLPTLQQNNCTNSL VPIPTESPGATVFFALHCRRGTKC | 71              | SOX4            |

**Table S2- Amino acid sequences of the SEP transgenes used in this work.**

| <b>Name</b>          | <b>Amino acid sequence</b>                                                                                                     |
|----------------------|--------------------------------------------------------------------------------------------------------------------------------|
| 3XFLAG-GSGX-SEP01    | MDYKDHDGDYKDHDIDYKDDDDKGGSG <b>AbK</b> VRPDAISRSCAGPARLLVPGARVNAR<br>PRRPRSPD                                                  |
| 3XFLAG-GSGX-SEP02    | MDYKDHDGDYKDHDIDYKDDDDKGGSG <b>AbK</b> TVRTGRSRGSEAVSGLGKKCLLDLAL<br>GGTLATRVGVIG                                              |
| 3XFLAG-GSGX-SEP03    | MDYKDHDGDYKDHDIDYKDDDDKGGSG <b>AbK</b> CLRRTTGYGHDFRVPSFRSPAADPR<br>RQTEALQ                                                    |
| 3XFLAG-GSGX-SEP04    | MDYKDHDGDYKDHDIDYKDDDDKGGSG <b>AbK</b> ASEGKPRPGQAWRLPLEIGRAPFPAP<br>RQQLCNSQPG                                                |
| 3XFLAG-GSGX-SEP05    | MDYKDHDGDYKDHDIDYKDDDDKGGSG <b>AbK</b> TAPGLLKMSRICINIQQESIIVCPSSRA<br>AKNGGIITSSKATL                                          |
| 3XFLAG-GSGX-SEP06    | MDYKDHDGDYKDHDIDYKDDDDKGGSG <b>AbK</b> VHCCHSPDCIFETQALSNLQRTKRQP<br>PRYVCWEGVIVTAL                                            |
| 3XFLAG-GSGX-SEP07    | MDYKDHDGDYKDHDIDYKDDDDKGGSG <b>AbK</b> EDRWTA/WPVTSPLESGPLSSAG<br>HIIGILTHSLNSLFIKT                                            |
| 3XFLAG-GSGX-SEP08    | MDYKDHDGDYKDHDIDYKDDDDKGGSG <b>AbK</b> LPERANKKGAGVGSKINTSEFMMAST<br>EALIGLVSKQTITLWKKG                                        |
| 3XFLAG-GSGX-SEP09    | MDYKDHDGDYKDHDIDYKDDDDKGGSG <b>AbK</b> IRPQSSMSKHIPQFCVGLGHTFMEFL<br>KSGSDYCAQHDLYADK                                          |
| 3XFLAG-GSGX-SEP10    | MDYKDHDGDYKDHDIDYKDDDDKGGSG <b>AbK</b> ALRSIKSIAGSCLCSRQRRCGSSAAIF<br>PEGIFRCLSPKFGQEFPE                                       |
| 3XFLAG-GSGX-SEP11    | MDYKDHDGDYKDHDIDYKDDDDKGGSG <b>AbK</b> LAFWAPNWHWEGVTESTRLIPGPTFK<br>RSSTYNPSISLTKTSLN                                         |
| 3XFLAG-GSGX-SEP12    | MDYKDHDGDYKDHDIDYKDDDDKGGSG <b>AbK</b> GACLIVNPSAWTPEPTQLSVCRGPRV<br>RGDAQAVAETTLEMLMKTGLSC                                    |
| 3XFLAG-GSGX-SEP13    | MDYKDHDGDYKDHDIDYKDDDDKGGSG <b>AbK</b> SPANGEQSRSRCLGSEGSLRHRHG<br>RWIQPPPAAPGAMRRGAAATATARL                                   |
| 3XFLAG-GSGX-SEP14    | MDYKDHDGDYKDHDIDYKDDDDKGGSG <b>AbK</b> ASCPASVTSGSAFTKAFTRARGNLER<br>RAPGTLVGAWGCEAAASPAGHYNYILRM                              |
| 3XFLAG-GSGX-SEP15    | MDYKDHDGDYKDHDIDYKDDDDKGGSG <b>AbK</b> RQRLNSRRANQRHPESHVGLGAQRP<br>SANPLKVSQRNLRDDLPAERNCF                                    |
| 3XFLAG-GSGX-SEP16    | MDYKDHDGDYKDHDIDYKDDDDKGGSG <b>AbK</b> YRFRSQLFTGISAAATAHSYPRRFSTL<br>LLAEDSPLSRPPHRTSKKCSSIG                                  |
| 3XFLAG-GSGX-SEP17    | MDYKDHDGDYKDHDIDYKDDDDKGGSG <b>AbK</b> LWFGNVVDQLDMLAKCAPCNKMKRR<br>DKMMSFSHIVKPKTNAFCETKLTNL                                  |
| 3XFLAG-GSGX-SEP18    | MDYKDHDGDYKDHDIDYKDDDDKGGSG <b>AbK</b> EGKWTICPGLQPDTIFQSQNLHFLCK<br>CQKNETPSLPSQRRGNSHVGITLGS                                 |
| 3XFLAG-GSGX-SEP19    | MDYKDHDGDYKDHDIDYKDDDDKGGSG <b>AbK</b> LSRCRRLPEERGGVPLALRPSRAEST<br>RHSRTSEASRPRGTPRRPPAGPRPLFPL                              |
| 3XFLAG-GSGX-SEP20    | MDYKDHDGDYKDHDIDYKDDDDKGGSG <b>AbK</b> ASDTQAVPDVSGRSRARRYAEWSSG<br>LRRGAEPGWAGLAGPAEGRRRLSGGEHALLHWRLS                        |
| 3XFLAG-GSGX-SEP21    | MDYKDHDGDYKDHDIDYKDDDDKGGSG <b>AbK</b> VQGSSGRHFRELVDVAVAGVDPPELPPK<br>PSCSPAASLIPLFFLDLSPSRPWNPIFGLGSSAAWA                    |
| 3XFLAG-GSGX-SEP22    | MDYKDHDGDYKDHDIDYKDDDDKGGSG <b>AbK</b> RAGPRERQRRWRSRGRSPGREVWM<br>RLTRGRAASPALVQRSPSASDQSPVIMQDSGPISASS                       |
| 3XFLAG-GSGX-SEP23    | MDYKDHDGDYKDHDIDYKDDDDKGGSG <b>AbK</b> GDQPCASGRSTLPPGNAREAKPPKK<br>RCLLAPRWYPEGTPNGGSTTLPSAPPPASAGLKSHPPPPEK                  |
| 3XFLAG-GSGX-SEP24    | MDYKDHDGDYKDHDIDYKDDDDKGGSG <b>AbK</b> LEELLPLPAPFLQKGGGNIHLFMPVCC<br>MQAFWLPTLQQNCTNSLVPIPTESPGATVFFALHCRRTKTC                |
| 3XFLAG-GSGX-mScarlet | MDYKDHDGDYKDHDIDYKDDDDKGGSG <b>AbK</b> VSKGEAVIKEFMRFKVMHEGSMNGH<br>EFEIEGEGEGRPYEGTQTAKLKVTKGGPLPFSWDILSPQFMYGSRAFIKHPADIPDYY |

|                |                                                                                                                                                                                                                                                                                                               |
|----------------|---------------------------------------------------------------------------------------------------------------------------------------------------------------------------------------------------------------------------------------------------------------------------------------------------------------|
|                | KQSFPEGFKWERVMNFEDGGAVTVTQDTSLEDGTLIYKVKLRGTFPPDGPVMQKK<br>TMGWEASTERLYPEDGVKGDIKMALRLKDGGRYLADFKTTYKAKKPVQMPGAYNV<br>DRKLDITSHNEDYTVVEQYERSEGRHSTGGMDELYKSGLRSRAQASNSAVDGTAGP<br>GSTGSR                                                                                                                      |
| FLAG-GSGX-MRI2 | MDYKDDDDKSGG <b>AbK</b> ETLQSETKTRVLPWLTAQVATKNVAPMKAPKRMMAAVPV<br>AAARCDSSGQKTPANLTPCDKDCVLHE                                                                                                                                                                                                                |
| HA-HIST1H2BB   | MYPYDVPDYAGGGGSPESKSAAPKKGSKKAITKAQKKGKKRKRSRKESYSIYVY<br>KVLKQVHPDTGISSKAMGIMNSFVNDIFERIAGEASRLAHYNKRSTITSREIQTAVRLLL<br>PGELAKHAVSEGTKAVTKYTSSK                                                                                                                                                             |
| HA-HIST1H4A    | MYPYDVPDYAGGGGSSGRGKGGKGLGKGGAKRHRKVLDRDNIQGITKPAIRRLARRG<br>GVKRISGLIYEETRGLVKVFLENVIRDAVYTEHAKRKTVTAMDVVYALKRQGRTYLGF<br>GG                                                                                                                                                                                 |
| HA-H3F3C       | MYPYDVPDYALMARTKQTARKSTGGKAPRKQLATKAARKSTPSTCGVKPHRYRPGT<br>VALREIRRYQKSTELLIRKLPFQRLVREIAQDFNTDLRFQSAAVGALQEASEAYLVGLLE<br>DTNLCAIHAKRVTIMPKDIQLARRIGERA                                                                                                                                                     |
| HA-HMGN1       | MYPYDVPDYAGGGGSPKRKVSSAEGAAKEEPKRRSARLSAKPPAKVEAKPKKAAAK<br>DKSSDKKVQTKGKRGAKGKQAEVANQETKEDLPAENGETKTEESPASDEAGEKEAK<br>SD                                                                                                                                                                                    |
| HA-HMGN4       | MYPYDVPDYAGGGGSPKRKAKGDAKGDKAKVKDEPQRRSARLSAKPAPPKPEPRP<br>KKASAKKGEKLPKGRKGDAGKDGNNPAKNRDASTLQSQAEGTDAK                                                                                                                                                                                                      |
| HA-NME2        | MYPYDVPDYAGGGGSANLERTFIAIKPDGVQRGLVGEIIRFEQKGFRLVAMKFLRAS<br>EEHLKQHYIDLKDRPFFPGLVKYMNSGPVAMVWEGLNVVKTGRVMLGETNPADSK<br>PGTIRGDFCIQVGRNIIHGSDSVKSAEKEISLWFKPEELVDYKSCAHDWVYE                                                                                                                                  |
| MRI2-FLAG      | METLQSETKTRVLPWLTAQVATKNVAPMKAPKRMMAAVPVAAARCDSSGQKTPA<br>NLTPCDKDCVLHEDYKDDDDK                                                                                                                                                                                                                               |
| 3XFLAG-SEP10   | MDYKDHDGDYKDHDIDYKDDDDKALRSIKSIAGSCLCSRQRRCGSSAAIFPEGIFRCL<br>SPKFGQEFPE                                                                                                                                                                                                                                      |
| SEP10-EGFP     | MALRSIKSIAGSCLCSRQRRCGSSAAIFPEGIFRCLSPKFGQEFPEGSVSKGEELFTG<br>VVPILVELDGDVNGHKFSVSGEGEDATYGKLTCLKFICTTGKLPVPWPTLVTTLYGVQ<br>CFSRYPDHMKQHDFFKSAMPEGYVQERTIFFKDDGNYKTRAEVKFEGDTLVNRIELK<br>GIDFKEDGNILGHKLEYNYNSHNVYIMADKQKNGIKVNFKIRHNIEDGSVQLADHYQQ<br>NTPIGDGPVLLPDNHYLSTQSALS KDPNEKRDHMLLEFVTAAGITLGMDELYK |
